# Supplementary material for: The Audibility of Low Vision Devices with Speech Output Used by Older Adults with Dual Sensory Impairment
Source: PubMed Central journal article supplement — Optom Vis Sci. 2019 May 2;96(5):345–53. doi: 10.1097/OPX.0000000000001374 (PMC6493671; doi:10.1097/opx.0000000000001374), 2019-05-02
Supplement: opx-96-345-s004.pdf [file opx-96-345-s004.pdf]

**Appendix Table A1.** Pairwise comparisons. Wilcoxon signed-rank test.

|                           | Repetitions | Volume          | T-statistics | P-value |
|---------------------------|-------------|-----------------|--------------|---------|
| <b>Talking Watch</b>      |             |                 |              |         |
| Accuracy Scores           | 1x / 4x     | Normal          | 4.5          | < .001  |
|                           |             | Medium          | 22.0         | .005    |
|                           |             | High            | 9.5          | .012    |
|                           | 1x          | Normal / Medium | 5.5          | < .001  |
|                           |             | Medium / High   | 16.0         | .004    |
|                           |             | Normal / High   | 5.5          | < .001  |
|                           | 4x          | Normal / Medium | 0.0          | < .001  |
|                           |             | Medium / High   | 17.0         | .004    |
|                           |             | Normal / High   | 0.0          | < .001  |
| Confidence Scores         | 1x / 4x     | Normal          | 26.0         | < .001  |
|                           |             | Medium          | 6.5          | < .001  |
|                           |             | High            | 19.5         | .001    |
|                           | 1x          | Normal / Medium | 5.5          | < .001  |
|                           |             | Medium / High   | 13.0         | < .001  |
|                           |             | Normal / High   | 3.0          | < .001  |
|                           | 4x          | Normal / Medium | 0.0          | < .001  |
|                           |             | Medium / High   | 18.0         | < .001  |
|                           |             | Normal / High   | 0.0          | < .001  |
| <b>Talking Scanner</b>    |             |                 |              |         |
| Accuracy Scores           | 1x / 4x     | Normal          | 52.0         | < .001  |
|                           |             | Medium          | 16.5         | .004    |
|                           |             | High            | 34.0         | 0.14    |
|                           | 1x          | Normal / Medium | 24.5         | < .001  |
|                           |             | Medium / High   | 64.0         | .023    |
|                           |             | Normal / High   | 3.0          | < .001  |
|                           | 4x          | Normal / Medium | 20.0         | < .001  |
|                           |             | Medium / High   | 49.5         | .345    |
|                           |             | Normal / High   | 46.0         | < .001  |
| Confidence Scores         | 1x / 4x     | Normal          | 5.5          | < .001  |
|                           |             | Medium          | 31.5         | < .001  |
|                           |             | High            | 34.0         | .417    |
|                           | 1x          | Normal / Medium | 0.0          | < .001  |
|                           |             | Medium / High   | 38.5         | < .001  |
|                           |             | Normal / High   | 0.0          | < .001  |
|                           | 4x          | Normal / Medium | 52.0         | < .001  |
|                           |             | Medium / High   | 40.5         | < .001  |
|                           |             | Normal / High   | 25.0         | < .001  |
| <b>Talking Calculator</b> |             |                 |              |         |
| Accuracy Scores           | 1x / 4x     | Normal          | 4.0          | < .001  |
|                           |             | Medium          | 19.0         | < .001  |
|                           |             | High            | 28.5         | .004    |
|                           | 1x          | Normal / Medium | 9.5          | < .001  |
|                           |             | Medium / High   | 13.5         | < .001  |
|                           |             | Normal / High   | 0.0          | < .001  |
|                           | 4x          | Normal / Medium | 1.5          | < .001  |
|                           |             | Medium / High   | 31.0         | .001    |
|                           |             | Normal / High   | 1.0          | < .001  |
| Confidence Scores         | 1x / 4x     | Normal          | 6.5          | < .001  |
|                           |             | Medium          | 16.0         | < .001  |
|                           |             | High            | 42.0         | .093    |
|                           | 1x          | Normal / Medium | 0.0          | < .001  |
|                           |             | Medium / High   | 5.0          | < .001  |
|                           |             | Normal / High   | 0.0          | < .001  |
|                           | 4x          | Normal / Medium | 0.0          | < .001  |
|                           |             | Medium / High   | 53.0         | .003    |
|                           |             | Normal / High   | 3.5          | < .001  |
